# Supplementary material
Source: PubMed Central journal article supplement (PMC6854831)
Supplement: ao9b02792_si_001.pdf [file ao9b02792_si_001.pdf]

# ESI

## **Photo-excited Toluidine blue inhibits Tau aggregation in Alzheimer's disease**

**Tushar Dubey**<sup>1,2</sup>, **Nalini Vijay Gorantla**<sup>1,2</sup> **Kagepura Thammaiah Chandrashekara**<sup>3</sup>,  
**Subashchandra Chinnathambi**<sup>1,2\*</sup>

<sup>1</sup>Neurobiology Group, Division of Biochemical Sciences, CSIR-National Chemical Laboratory,  
Dr. Homi Bhabha Road, 411008 Pune, India

<sup>2</sup>Academy of Scientific and Innovative Research (AcSIR), 411008 Pune, India

<sup>3</sup>Institution of Excellence, Vijnana Bhavan, University of Mysore, Manasagangotri,  
570006 Mysore, India

[\*] To whom correspondence should be addressed: **Prof. Subashchandra Chinnathambi**,  
Neurobiology group, Division of Biochemical Sciences, CSIR-National Chemical Laboratory (CSIR-  
NCL), Dr. Homi Bhabha Road, 411008 Pune, India, Telephone: +91-20-25902232, Fax. +91-20-  
25902648. Email: [s.chinnathambi@ncl.res.in](mailto:s.chinnathambi@ncl.res.in)

# Supplementary 1

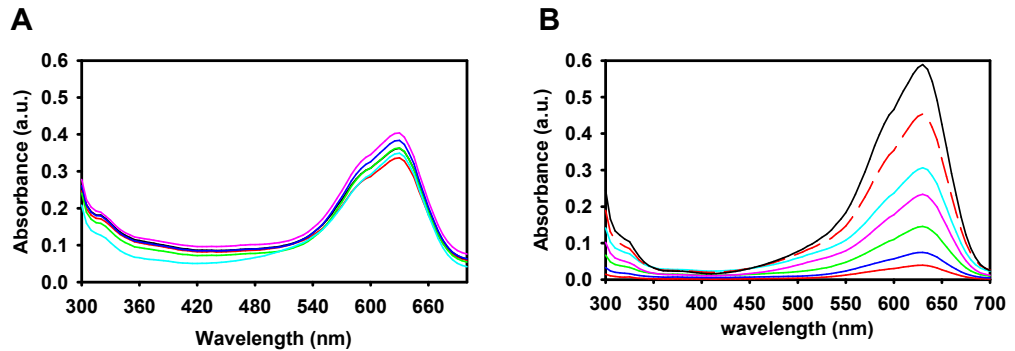

**Supplementary figure 1: The UV absorption curve of TB.** A) The hypochromic shift in UV-visible absorption spectra of TB in presence of various concentration of Tau. B) The UV spectrum showing the absorption maxima 630 nm.

# Supplementary 2

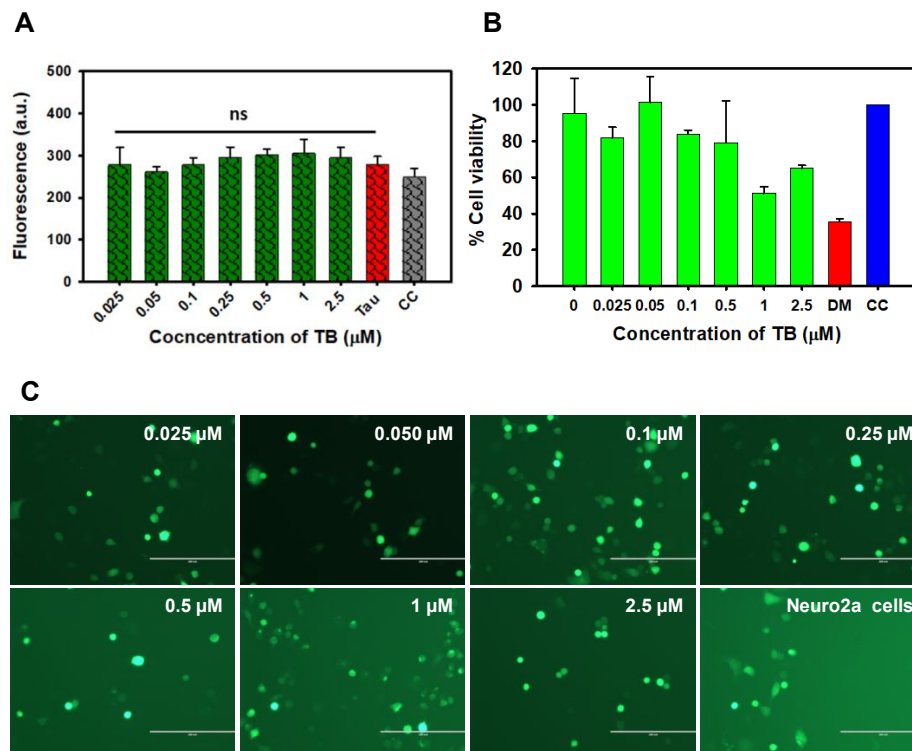

**Supplementary figure 2: The biocompatibility of TB.** A) The DCFDA assay indicated the extent of ROS production by TB in Neuro2a cells treated with 2.5  $\mu\text{M}$  of Tau aggregates. B) The effect of TB on cell viability was analysed by MTT assay. TB was not cytotoxic at concentration as high as 0.5  $\mu\text{M}$ . C) Fluorescence microscopic analysis of Neuro2a cells revealed the no difference in DCFDA fluorescence in TB treated cells and control.

## Supplementary 3

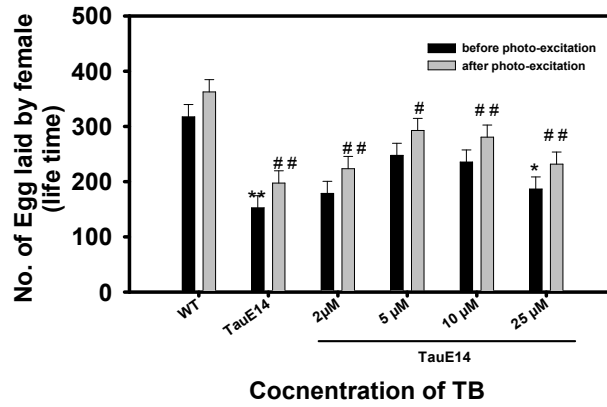

**Supplementary figure 3. TB and PE-TB increased the longevity of transgenic *Drosophila* flies.** The fecundity assay was carried out to check the fitness of flies. The bell shaped pattern indicated that 5 μM of PE-TB exposure increased egg laying or reproducibility in females.
